# Supplementary material
Source: MDPI journal article supplement (https://www.mdpi.com/2673-8937/1/2/7)
Supplement: s1 [file s1]

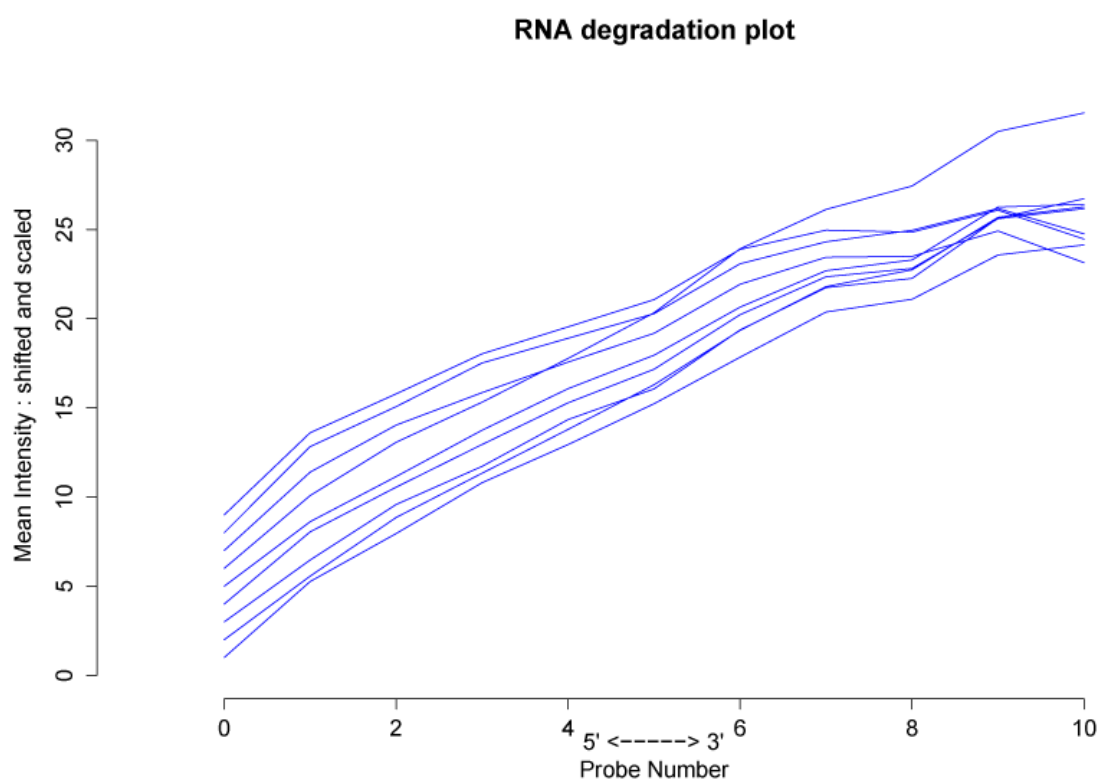

Figure S1. RNA degradation plot for the 9 individual arrays.

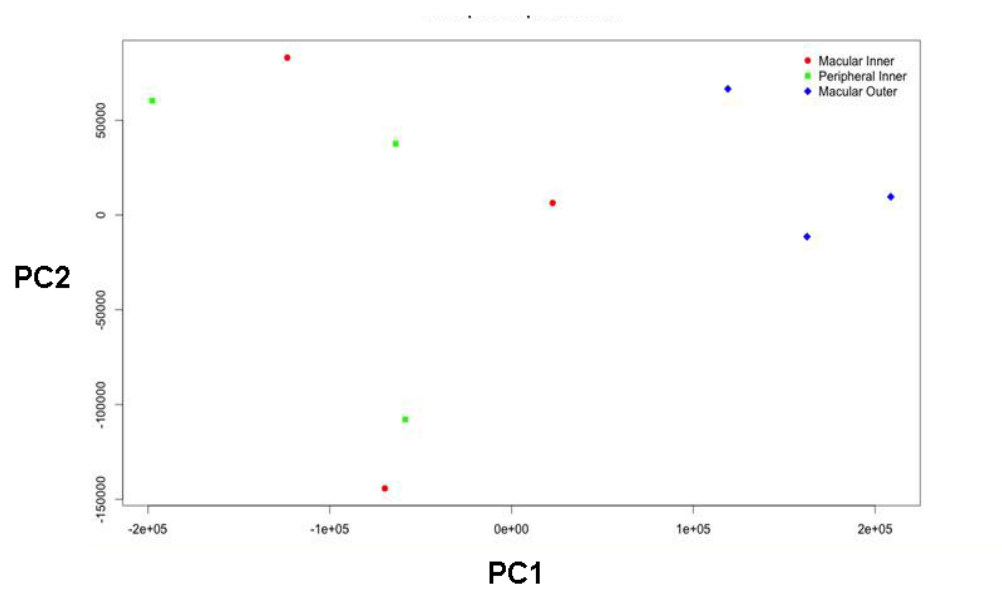

Figure S2. Plot showing the 9 arrays plotted along the first and second principle components. The macula outer CECs from all donors are grouped together, while the macular and peripheral inner CECs from each individual donor are positioned close together
